# Supplementary material for: Can the two-parameter recursive digital filter baseflow separationmethod really be calibrated by the conductivity mass balance method?
Source: Copernicus journal article supplement (doi:10.5194/hess-2020-488), 2020-10-28
Supplement: Supplementary file 1 [file hess-2020-488-supplement.pdf]

# Supplements

**Table S1**

**Table S1. Basic information of the 26 US hydrological stations selected for this study.**

| Sit number | State | Area (km <sup>2</sup> ) | N (days) | Correlation<br>(Streamflow & SC) | $\alpha$ | BFI <sub>max</sub> |       |
|------------|-------|-------------------------|----------|----------------------------------|----------|--------------------|-------|
|            |       |                         |          |                                  |          | Eck.               | Cali. |
| 02298202   | FL    | 966                     | 1808     | -0.68                            | 0.989    | 0.50               | 0.46  |
| 02303000   | FL    | 570                     | 728      | -0.77                            | 0.995    | 0.36               | 0.58  |
| 02306774   | FL    | 46                      | 851      | -0.52                            | 0.987    | 0.23               | 0.26  |
| 02297100   | FL    | 342                     | 2979     | -0.60                            | 0.994    | 0.45               | 0.39  |
| 08068275   | TX    | 482                     | 2801     | -0.52                            | 0.990    | 0.50               | 0.50  |
| 02160105   | SC    | 1966                    | 1363     | -0.61                            | 0.989    | 0.51               | 0.39  |
| 02160700   | SC    | 1150                    | 1392     | -0.62                            | 0.993    | 0.52               | 0.42  |
| 02207120   | GA    | 417                     | 1391     | -0.52                            | 0.991    | 0.36               | 0.27  |
| 03007800   | PA    | 642                     | 3288     | -0.51                            | 0.984    | 0.39               | 0.24  |
| 03044000   | PA    | 3517                    | 2923     | -0.66                            | 0.997    | 0.22               | 0.40  |
| 03072655   | PA    | 11500                   | 2192     | -0.51                            | 0.978    | 0.35               | 0.30  |
| 03106000   | PA    | 922                     | 3288     | -0.48                            | 0.991    | 0.24               | 0.24  |
| 03201980   | OH    | 258                     | 2193     | -0.50                            | 0.990    | 0.19               | 0.40  |
| 03321500   | KY    | 23779                   | 1017     | -0.74                            | 0.984    | 0.28               | 0.38  |
| 06037500   | MT    | 1127                    | 1096     | -0.86                            | 0.998    | 0.86               | 0.67  |
| 06296120   | MT    | 110973                  | 3288     | -0.66                            | 0.997    | 0.44               | 0.49  |
| 06711565   | CO    | 8782                    | 4018     | -0.55                            | 0.993    | 0.27               | 0.17  |
| 07079300   | CO    | 129                     | 1827     | -0.64                            | 0.989    | 0.47               | 0.27  |
| 07086000   | CO    | 1106                    | 3288     | -0.61                            | 0.994    | 0.40               | 0.26  |
| 07119700   | CO    | 28234                   | 3288     | -0.62                            | 0.993    | 0.37               | 0.50  |
| 03036000   | PA    | 891                     | 3288     | -0.61                            | 0.995    | 0.19               | 0.53  |
| 03067510   | WV    | 156                     | 3288     | -0.51                            | 0.990    | 0.20               | 0.29  |
| 03374100   | IN    | 29280                   | 2558     | -0.70                            | 0.989    | 0.45               | 0.36  |
| 06089000   | MT    | 4595                    | 3288     | -0.63                            | 0.997    | 0.36               | 0.46  |
| 07081200   | CO    | 257                     | 1827     | -0.74                            | 0.985    | 0.55               | 0.24  |
| 07097000   | CO    | 10422                   | 3288     | -0.74                            | 0.996    | 0.45               | 0.54  |
| Average    |       |                         |          |                                  | 0.991    | 0.39               | 0.39  |
| SD         |       |                         |          |                                  | 0.005    | 0.15               | 0.12  |

**Figure S1**

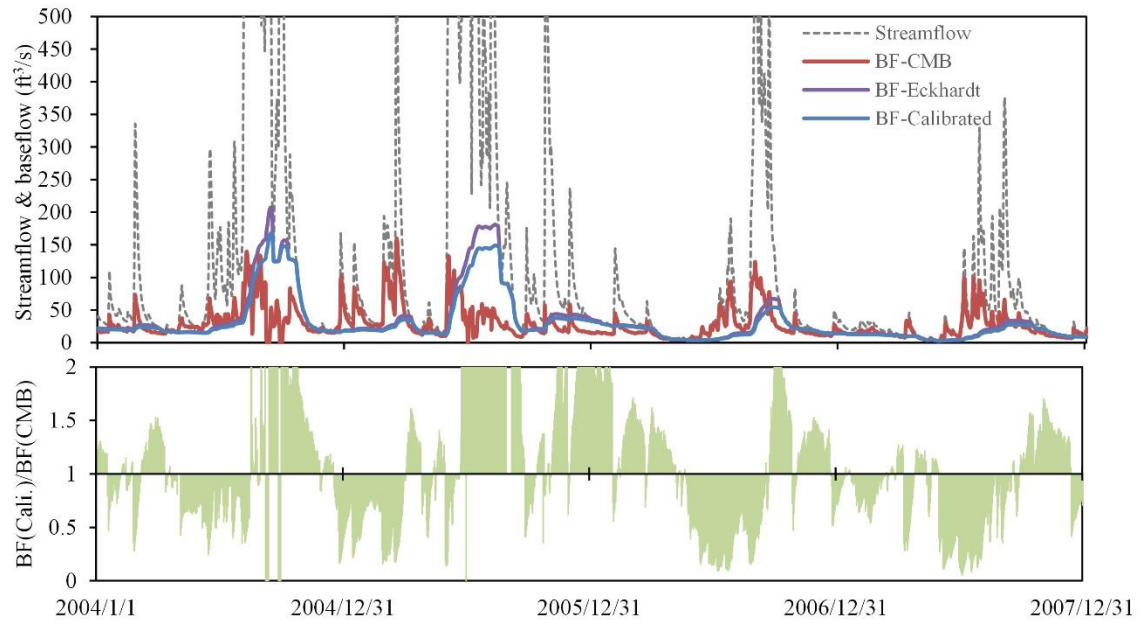

**Figure S1. Bias between daily baseflow series generated by the conductivity mass balance (CMB) and Eckhardt methods after calibration for the United States Geological Survey (USGS) station 02297100. BF represents baseflow.**

**Figure S2**

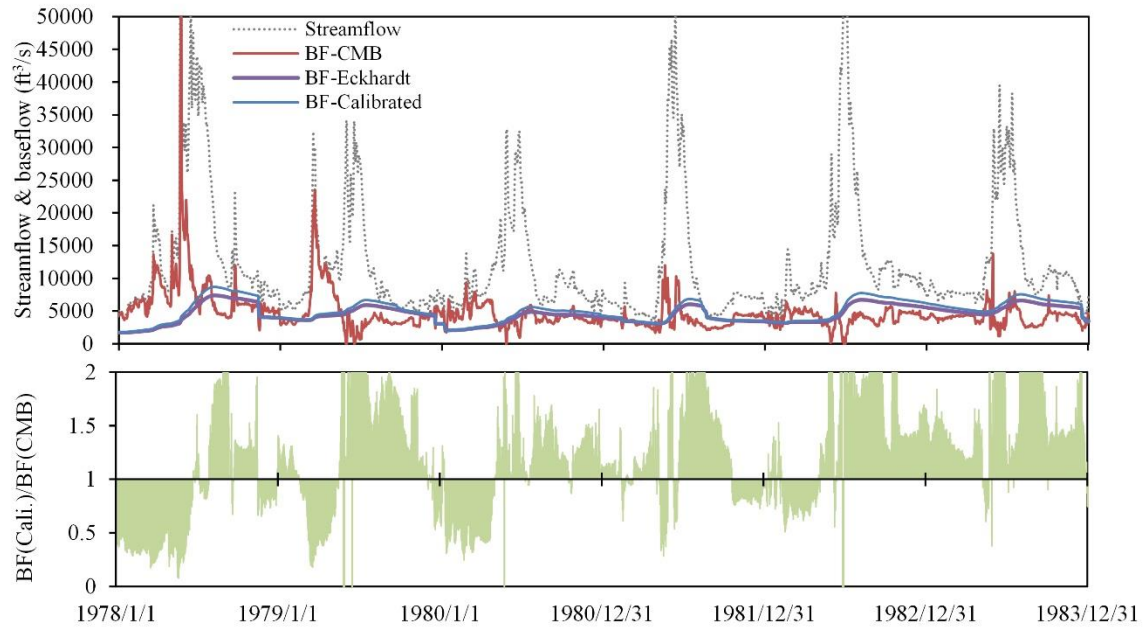

**Figure S2. Bias between daily baseflow series generated by the conductivity mass balance (CMB) and Eckhardt methods after calibration for the United States Geological Survey (USGS) station 06296120. BF represents baseflow.**

**Figure S3**

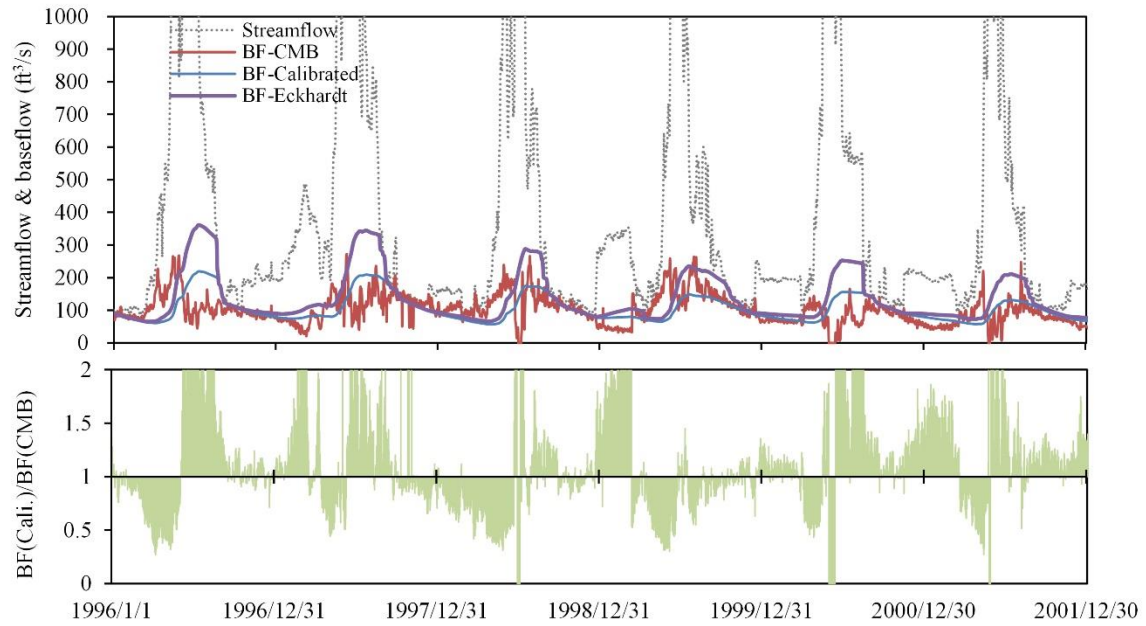

**Figure S3. Bias between daily baseflow series generated by the conductivity mass balance (CMB) and Eckhardt methods after calibration for the United States Geological Survey (USGS) station 07086000. BF represents baseflow.**

**Figure S4**

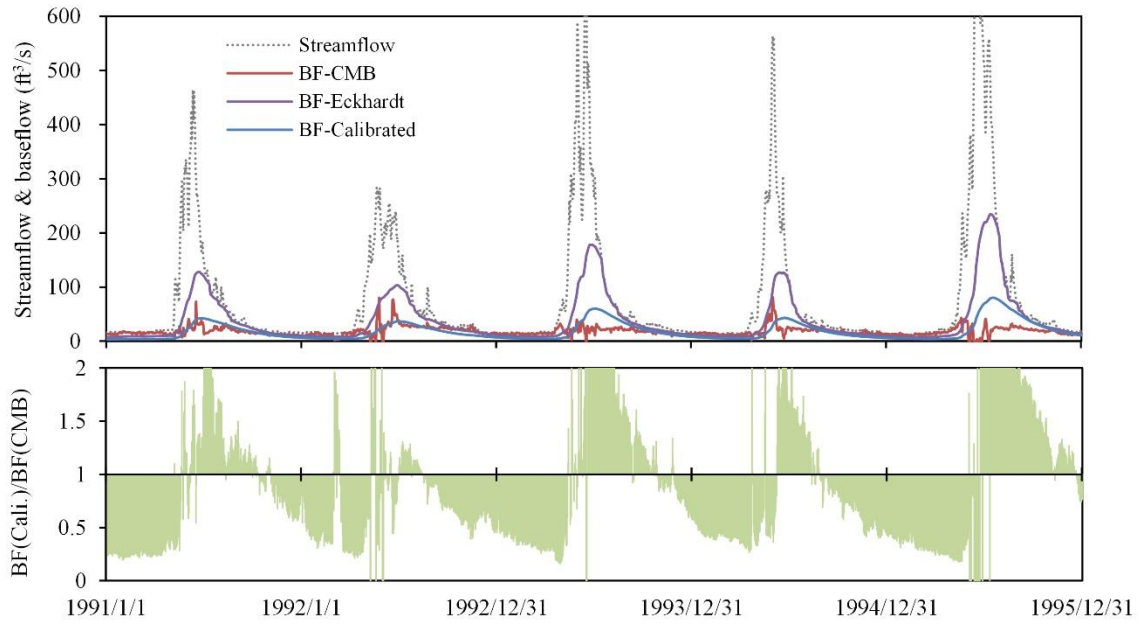

**Figure S4. Bias between daily baseflow series generated by the conductivity mass balance (CMB) and Eckhardt methods after calibration for the United States Geological Survey (USGS) station 07081200. BF represents baseflow.**

**Figure S5**

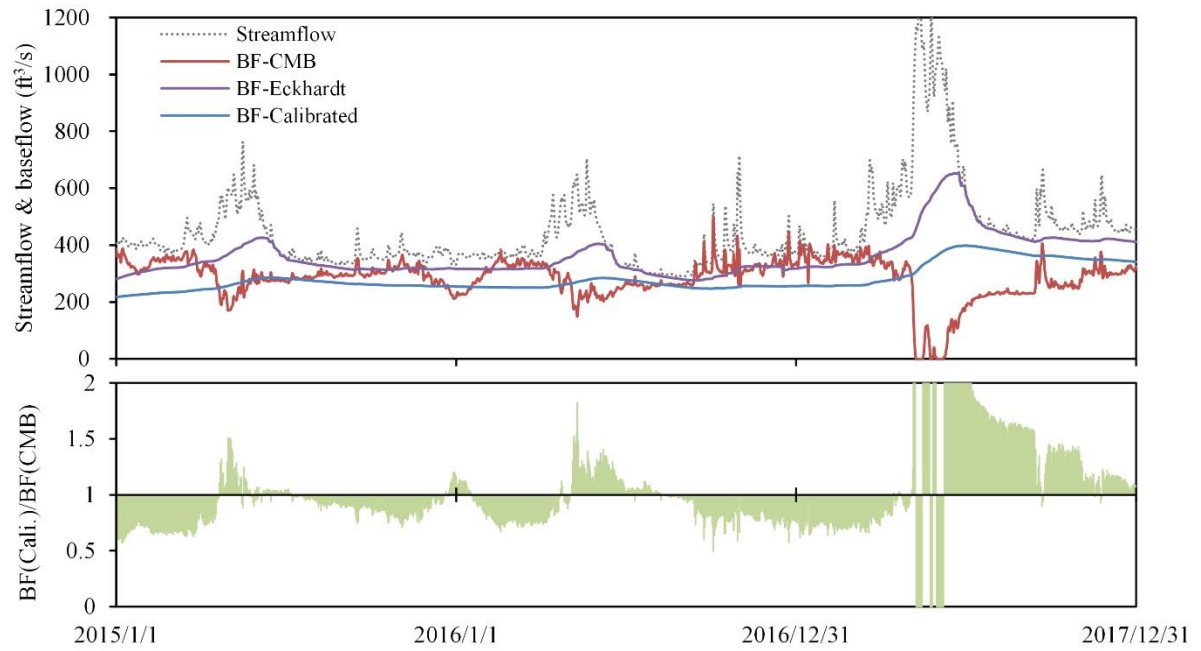

**Figure S5. Bias between daily baseflow series generated by the conductivity mass balance (CMB) and Eckhardt methods after calibration for the United States Geological Survey (USGS) station 0603750.**

**BF represents baseflow.**
