# Supplementary material for: Can the two-parameter recursive digital filter baseflow separationmethod really be calibrated by the conductivity mass balance method?
Source: Copernicus journal article supplement (doi:10.5194/hess-2020-488), 2020-10-28
Supplement: Supplementary file [file hess-2020-488-AC3-supplement.pdf]

## Response to reviewer #2

*Explanation: The reviewer' comments are shown in black, the author's replies and revises are shown in blue. The quoted line numbers and page numbers are the Marked manuscripts.*

### Comments from reviewer #2:

Understanding baseflow is important and not straightforward and papers such as this which compare techniques are valuable. This is an interesting paper that I consider is publishable following moderate revisions. I have made several comments below that I hope are helpful. The Conclusions are a little understated and for more impact, I suggest that the authors explain better what is new and useful here. Perhaps because I thought that the Eckhardt filter always would yield different information to the chemical mass balance, I was not surprised that it is not calibratable in this was at least on a daily timestep (although many studies still seem to try).

**Response:** Thank you very much for reviewing our manuscript. We have revised the manuscript based on your comments and rewritten the conclusion part to emphasize the important findings and significance of this research. See the following for the reply to each comment.

Units. Flow is reported in cubic feet per second. I realise that the USA uses imperial units but SI units are preferable.

**Response:** Thank you for your reminder. We have converted all the units in the manuscript to the SI unit system, including Fig.3, Fig.5- Fig.7, Fig.S1- Fig.S5.

Although not suggesting that it needs to be included, the just published paper by Cartwright & Miller (2021, Journal of Hydrology, 593, 125895, <https://doi.org/10.1016/j.jhydrol.2020.125895>) also looks at the variability of stream EC and implications for water stores that sustain streamflow.

**Response:** Thank you for your recommendation, which gives us the privilege to read this interesting and highly relevant article. We have carefully read this article and introduced its views and main conclusions into our manuscript.

### Specific Comments:

#### **Abstract:**

The abstract is a good summary of the paper, but as with the conclusions it could be more impactful.

**Response:** Thanks, we have re-adjusted the summary based on the new conclusions.

***Introduction:***

Line 27: Should be rainfall not rainfall-runoff.

**Response:** Okay, it has been modified.

Lines 34-39. It would be useful to expand on this. Baseflow does indeed contain regional groundwater but also contains the other delayed stores of water that you discussed earlier (interflow, bank storage and return waters, slowly draining pools on the floodplain). Many of the earlier papers in hydrograph separation (eg. Nathan and McMahon, 1990) do not necessarily equate baseflow with groundwater inflows (see the first paragraph of their conclusions); however, many of the papers that have applied these techniques have. This is a subtle but important point whereby the assumptions with these techniques have changed a little over time.

**Response:** Thank you for your suggestion. We have discussed the content of this part in detail and emphasized the minor change in the concept of baseflow.

Lines 60-64. Benchmarking baseflow separation methods is difficult due to the associated assumptions (especially that we are applying a two-component separation to a multi-component system). By what criteria did Xie et al. determine this? Perhaps it is best to leave out that statement and concentrate on the uncertainties. In practice because the Eckhardt method is “tuneable” it should always perform better than the other filters with fixed parameter; however, that does not overcome the fundamental problems with this approach.

**Response:** Thanks for your suggestion, we have re-read the article by Xie et al. Their criterion is to select the most likely whole baseflow segments according to the recession theory, and then use these segments to test the effect of different baseflow separation methods. In our opinion, this criterion is based on the basic assumption of linear reservoir theory, that is to say, it is still empirical. Therefore, we agree with your point of view that the Eckhardt method has obvious advantages over other filtering methods or graphical methods, but its essence is still a filtering method, we can hardly say that it has the best effect, so we deleted this sentence.

Lines 70-74. The CMB approach goes back before Stewart et al. (2007). I think that Pinder & Jones (1969, Water Resources Research, 5, 438-445) introduced the technique and Yu & Schwartz (1999, Hydrological Processes, 13, 191-209) further formulated it.

**Response:** Thank you for your reminder. We have carefully read these articles and traced the CMB method back to these studies.

Lines 75-95. All this is correct, but in the context of this paper you should think about what is important. You already have mentioned that rivers contain water from multiple sources, in which case two-component hydrograph separations are not ideal. So is it more likely that the comparison will reveal those intermediate water stores (as in the Cartwright et al. and Rammal et al. studies) rather than being a viable method to calibrate the BFI parameter. There is also a timescale issue here. It may be that the BFI parameter can be calibrated on a long timescale (seasonal or annual) but not on a daily or weekly timescale (i.e., is it an annual average baseflow or a daily baseflow that you are concerned with?).

**Response:** Thank you for your suggestion, we agree with your opinion. We have adjusted the discussion in this paragraph according to the background of the article and emphasized the importance of comparing different methods to determine multiple transient water sources.

***Methods:***

Lines 131. See comment above about the origins of the CBM method.

**Response:** We have revised the introduction about the origin of the CMB method.

Lines 131-135. Somewhere here or in the introduction you should mention that the conductivity is presumed to reflect the overall salinity or concentration of a conservative component (e.g., Cl).

**Response:** Okay, we have discussed the relationship between conductivity and salinity or conservative components in the methods section.

Lines 136-141. Assigning the baseflow EC as the maximum (or 99th percentile) value assumes that at low flows the river is entirely fed by baseflow. This is probably fine as an assumption in drier areas but may not always be the case in high-rainfall areas. In many areas this maximum value is lower than the EC of regional groundwater – which is one of the lines of evidence that near-river water stores (such as bank return flows) may always contribute to the river (McCallum et al., 2010 and Cartwright & Irvine, 2020 both discuss this). This is also worth a brief discussion here.

**Response:** Okay, we have discussed the possible underestimation and the reasons for using the maximum streamflow conductivity to estimate the conductivity of the baseflow in high-rainfall areas.

Also did you assign a constant baseflow to each water year (or the whole record) or use the strategy outlined in Miller's papers where they interpolate between the maximum EC in each water year to assign a value of baseflow EC on individual days?

**Response:** Yes, we use Miller's strategy, which has been pointed out in the article.

Lines 146-151. There is some repetition here with the introduction. Since this is the methods, just tell us how you did the calibration.

**Response:** OK, we have abbreviated these sentences to avoid too much repetition.

It would be useful to include a bit of  $Q_C$  information. How complete are the records and did you attempt to infill missing data?

**Response:** Thanks for your suggestion, we have added the completeness of streamflow conductivity and interpolation principle in the data section. The streamflow data of all stations are continuous and complete, and the complete rate of the conductivity data of each station is greater than 90%. For the missing data, this study performed linear interpolation based on the conductivity values at both ends of the missing period.

***Results:***

In addition to the constraints described above. Baseflow estimation based on hydrograph separation requires that the flow regime is not overly influenced by human activities (eg. major dams or storages on the river). Both baseflow estimation techniques methods are best applied to streams that are uniformly gaining (both along their reaches and at all times). Can you be more specific as to whether the streams met these criteria.

**Response:** Thanks for your suggestion, we have discussed the basis for selecting these basins in the data section. We use the negative correlation coefficient between conductivity and runoff to exclude those hydrological stations that are obviously affected by human activities such as reservoirs, similar to the study of Miller et al., (2014).

Looking at Fig. 3, there is some difference with the results of Cartwright et al. (2014) in as much as there was a seasonal difference in that study – the estimates agreed better in summer than winter (proposed as being due to a higher proportion of transient water stores in winter). Do you see that in any of your studies?

**Response:** What needs to be explained here is that the periodic deviation mentioned in this study is after calibration, and the focus is on the difference between the rising and falling limbs of the wet season. It does not focus on the difference between wet and dry seasons. In terms of wet season and dry season, the deviation range of dry season between two wet seasons is often smaller (Fig. 3, Fig. S1-S5), as discussed by Cartwright et al. (2014), which may be mainly due to more transient water source components in the streamflow during wet season. In addition, the calibration process may aggravate the deviation of the dry season, Fig. S5 is an obvious example. Before calibration, the separation results of the two methods in the dry season are basically the same. After calibration, although the total deviation is minimized, the deviation in the dry season is significantly increased, which is contrary to common sense. We have added relevant discussions in the results section of the manuscript.

***Discussion:***

Line 240. Not sure what you mean by converge.

**Response:** We have changed the expression of this sentence. Our original intention is that transient water sources will flow into the river at different times and places.

Lines 243-246. Do you know whether that is really the case in your catchments? If there are the data it would be interesting to know whether the salinity of the stream ever reaches that of the regional groundwater as that informs us whether the transient water stores ever truly are absent.

**Response:** Indeed, we cannot be sure that every river basin will achieve the described situation, this is just a phenomenon that may exist in most river basins. Due to the lack of groundwater conductivity data, we have not been able to determine when the transient water sources will end. So we adjusted the expression of these sentences to make them more rigorous.

Lines 270-275. It would be useful to briefly introduce hysteresis loops and the information that they provide in the introduction.

**Response:** Okay, we have discussed the hysteresis loops and the information it reflects in the introduction.

Lines 283-290. Are any of these basins severely impacted by human activities and what steps did you take to exclude basins that might be unsuitable?

**Response:** We have discussed the basis for selecting these basins in the data section. We use the negative correlation coefficient between conductivity and streamflow to exclude those hydrological stations that are obviously affected by human activities such as reservoirs.

Lines 326-336 and Fig. 7. This works well as a general concept but I would just call the “low salinity groundwater” something like “low salinity transient water” to be consistent with the way that you have discussed it in the paper. Some of that input is from the saturated zone (eg the bank return flow) so is groundwater but there may also be interflow or water from floodplain pools here.

**Response:** Thank you for your suggestions. We have changed these nomenclatures based on your suggestions to ensure their accuracy.

### ***Conclusions:***

These are a little understated. It is not surprising, given the assumptions inherent in the two techniques and the previous work that there is disagreement. Many of these conclusions have been made before by the studies that you quote earlier. So what is new and important here? Is it possible to use the calibration of the Eckhardt method to estimate total annual baseflow and then use the differences to do multicomponent separation? Does your study help understand the timescales over which either or both techniques yield useful information? Are there river types (size, rainfall, topography) where the comparison worked better?

Strengthening the conclusions would give the paper more impact.

**Response:** Thank you for your suggestions. We have adjusted the structure and presentation of the conclusion section, emphasized the innovations and main contributions of this research, the precautions for the application of the two baseflow separation methods, and the enlightenment for future research. The following is a reply to the four questions you raised:

*For the first question:* This study attempts to solve the confusion caused by the application of these two baseflow methods from a new perspective, focusing on the calibration effect of the CMB method on the Eckhardt method on the daily scale. In addition, this study validated and expanded the previous research conclusions (McCallum et al., 2010; Cartwright et al., 2014) within a wider range of watershed characteristics, and clarified the concept of four-component streamflow separation by comparing the results of the two methods.

*For the second question:* It is unwise to try to use the CMB method to calibrate the Eckhardt method. Instead, future research should optimize the determination criteria of the parameters based on the basic assumptions of the respective methods, and then achieve multi-component separation through comparison.

*For the third question:* If the baseflow is defined as the discharge amount of regional groundwater to river (which is used to evaluate the repeated calculation amount between surface water and groundwater resources), then the CMB method will have large errors in the rising limb, while the Eckhardt method will have large errors in the recession limb. Therefore, it may be a more reasonable choice to use Eckhardt method in the rising limb and CMB method in the falling limb.

*For the fourth question:* The main content of this study is to analyze the calibration effect of the CMB method on the Eckhardt method, so it only discusses the possibility of achieving the four-component separation of streamflow through comparison. In addition, we do not have detailed information on the characteristics of the 26 basins, so we cannot quantitatively analyze which basin type is more suitable for comparison. We will focus on the comparative effects under different basin characteristics in future research.
